# Supplementary material
Source: MDPI journal article supplement (https://www.mdpi.com/2073-4441/13/13/1836)
Supplement: s1 [file s1]

# Global Research On Riparian Zones In The XXI Century: A Bibliometric Analysis

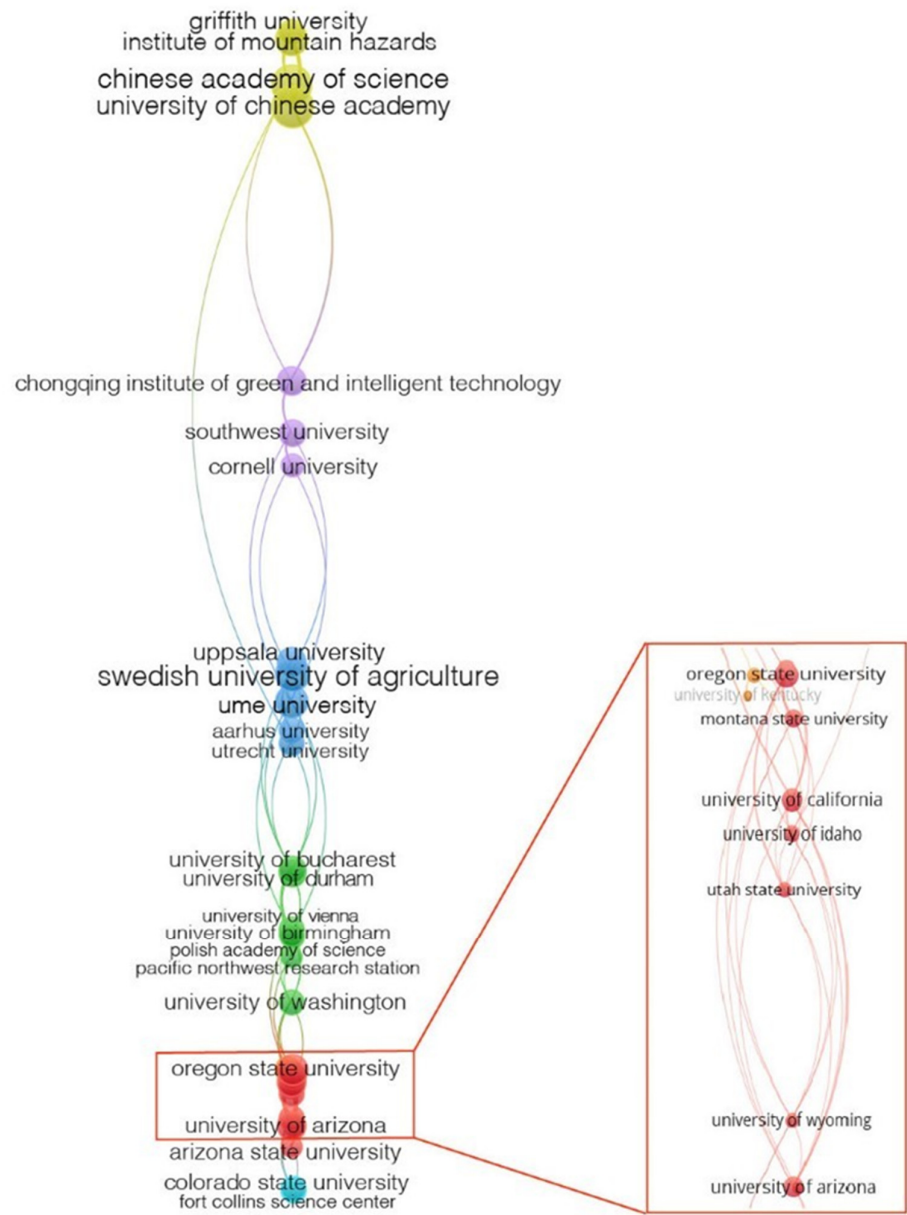

**Figure S1.** Co-authorship network between top institutions; a threshold of five for “minimum total link strength of an item” was applied, which resulted in a total of 25 institutions. The bubble size refers to the total number of articles; line thickness and color refer to link strength and clustering, respectively.

**Table S1.** Detailed query performed in Scopus and WoS.

| Scopus | WoS |
|--------|-----|
|--------|-----|

|                   |                                                                                                                                                                                                                                                                                                                                                                                                                                                                                                                                                                                                                                                                                                                                                                                                                                                                                             |             |
|-------------------|---------------------------------------------------------------------------------------------------------------------------------------------------------------------------------------------------------------------------------------------------------------------------------------------------------------------------------------------------------------------------------------------------------------------------------------------------------------------------------------------------------------------------------------------------------------------------------------------------------------------------------------------------------------------------------------------------------------------------------------------------------------------------------------------------------------------------------------------------------------------------------------------|-------------|
| Search Date       | Nov-27-2020                                                                                                                                                                                                                                                                                                                                                                                                                                                                                                                                                                                                                                                                                                                                                                                                                                                                                 | Nov-27-2020 |
| Total Results     | 1,171                                                                                                                                                                                                                                                                                                                                                                                                                                                                                                                                                                                                                                                                                                                                                                                                                                                                                       | 1,054       |
| Search Equation   | TITLE ("riparian zone*" OR "riparian area*") OR AUTHKEY ("ri-<br>parian zone*" OR "riparian area*") AND (LIMIT-TO (DOCTYPE ,<br>"ar") OR LIMIT-TO (DOCTYPE, "re") OR LIMIT-TO (DOCTYPE,<br>"ch") OR LIMIT-TO (DOCTYPE, "bk")) AND (LIMIT-TO<br>(PUBYEAR, 2020) OR LIMIT-TO (PUBYEAR, 2019) OR LIMIT-TO<br>(PUBYEAR, 2018 ) OR LIMIT-TO (PUBYEAR, 2017) OR LIMIT-TO<br>(PUBYEAR , 2016) OR LIMIT-TO (PUBYEAR, 2015) OR LIMIT-TO<br>(PUBYEAR, 2014) OR LIMIT-TO (PUBYEAR, 2013) OR LIMIT-TO<br>(PUBYEAR , 2012) OR LIMIT-TO (PUBYEAR, 2011) OR LIMIT-TO<br>(PUBYEAR, 2010 ) OR LIMIT-TO (PUBYEAR, 2009) OR LIMIT-TO<br>(PUBYEAR, 2008) OR LIMIT-TO (PUBYEAR, 2007) OR LIMIT-TO<br>(PUBYEAR, 2006) OR LIMIT-TO (PUBYEAR, 2005) OR LIMIT-TO<br>(PUBYEAR, 2004) OR LIMIT-TO (PUBYEAR, 2003) OR LIMIT-TO<br>(PUBYEAR, 2002) OR LIMIT-TO (PUBYEAR, 2001)) AND (LIMIT-<br>TO (LANGUAGE, "English")) |             |
| Temporal Interval | 2001-2020                                                                                                                                                                                                                                                                                                                                                                                                                                                                                                                                                                                                                                                                                                                                                                                                                                                                                   | 2001-2020   |

**Table S2.** Set of bibliometric indicators used in the analyses.

| Bibliometric Indicator                | Meaning                                                                                | Tool and Reference                                                                                                     |
|---------------------------------------|----------------------------------------------------------------------------------------|------------------------------------------------------------------------------------------------------------------------|
| Document Types                        | Number of records per each document type<br>(i.e. article, book, book chapter, review) | "biblioAnalysis" function from Bibliometrix (Aria and Cuccurullo, 2017)                                                |
| Most Cited Papers                     | Top 10 of cited papers about riparian zones                                            | "biblioAnalysis" function from Bibliometrix (Aria and Cuccurullo, 2017)                                                |
| Principal Journals or Sources         | Top 10 of journals that publishes on riparian zones                                    | "biblioAnalysis" function from Bibliometrix (Aria and Cuccurullo, 2017)                                                |
| Principal Countries                   | Map with the number of documents per country                                           | Biblioshiny (Aria and Cuccurullo, 2017)                                                                                |
| Principal Institutions                | Top 10 of institutions publishing on riparian zones                                    | "biblioAnalysis" function from Bibliometrix (Aria and Cuccurullo, 2017)                                                |
| Countries Collaboration Network       | Network of countries publishing on riparian zones                                      | VOS viewer 1.6.16 (van Eck and Waltman, 2020)                                                                          |
| Authors Collaboration Network         | Network of authors publishing on riparian zones                                        | VOS viewer 1.6.16 (van Eck and Waltman, 2020)                                                                          |
| Institutions Collaboration Network    | Network of institutions publishing on riparian zones                                   | Network construction: Biblioshiny (Aria and Cuccurullo, 2017). Plotting: VOS viewer 1.6.16 (van Eck and Waltman, 2020) |
| Cloud of Words                        | Graphic representation of principal key-words of riparian zones documents              | Biblioshiny (Aria and Cuccurullo, 2017). Plotting: WordArt.com.                                                        |
| Yearly Occurrence of the Top Keywords | Graphic representation of yearly occurrence of top keywords                            | "KeywordGrowth" from Bibliometrix (Aria and Cuccurullo, 2017)                                                          |

**Table S3.** Citations per country (top 20).

| Country        | Total Citations | Average Article Citations |
|----------------|-----------------|---------------------------|
| USA            | 9919            | 32.95                     |
| CANADA         | 1936            | 34.57                     |
| AUSTRALIA      | 1914            | 34.18                     |
| UNITED KINGDOM | 1046            | 37.36                     |
| CHINA          | 1041            | 11.97                     |
| FRANCE         | 961             | 36.96                     |
| BRAZIL         | 776             | 15.52                     |
| SWEDEN         | 692             | 40.71                     |
| GERMANY        | 608             | 19.61                     |
| NETHERLANDS    | 551             | 50.09                     |
| SOUTH AFRICA   | 384             | 16.70                     |
| SPAIN          | 378             | 34.36                     |
| ITALY          | 286             | 22.00                     |
| HUNGARY        | 268             | 67.00                     |
| DENMARK        | 243             | 27.00                     |
| JAPAN          | 196             | 15.08                     |
| MEXICO         | 152             | 16.89                     |
| SWITZERLAND    | 137             | 19.57                     |

|        |     |       |
|--------|-----|-------|
| POLAND | 128 | 18.29 |
| CHILE  | 115 | 16.43 |

**Table S4.** Yearly occurrence of top keywords.

| Authors Keywords |               |                |                |               |               |                 |             |                 |         |          |
|------------------|---------------|----------------|----------------|---------------|---------------|-----------------|-------------|-----------------|---------|----------|
| Year             | Riparian Zone | Riparian Zones | Riparian Areas | Riparian Area | Riparian      | Denitrification | Groundwater | Water Quality   | Nitrate | Nitrogen |
| 2001             | 11            | 2              | 3              | 0             | 3             | 2               | 3           | 3               | 1       | 1        |
| 2002             | 15            | 1              | 3              | 2             | 1             | 3               | 1           | 1               | 2       | 0        |
| 2003             | 16            | 6              | 2              | 2             | 0             | 4               | 1           | 2               | 2       | 1        |
| 2004             | 11            | 7              | 6              | 2             | 2             | 3               | 4           | 1               | 4       | 3        |
| 2005             | 11            | 5              | 5              | 2             | 3             | 1               | 2           | 2               | 0       | 0        |
| 2006             | 14            | 6              | 2              | 1             | 3             | 3               | 4           | 1               | 5       | 1        |
| 2007             | 13            | 7              | 2              | 3             | 2             | 2               | 3           | 5               | 0       | 1        |
| 2008             | 13            | 5              | 5              | 1             | 4             | 5               | 3           | 1               | 0       | 4        |
| 2009             | 22            | 7              | 4              | 0             | 3             | 7               | 2           | 0               | 4       | 5        |
| 2010             | 16            | 4              | 6              | 1             | 5             | 5               | 2           | 1               | 6       | 2        |
| 2011             | 20            | 5              | 4              | 6             | 2             | 1               | 2           | 4               | 1       | 0        |
| 2012             | 17            | 6              | 3              | 5             | 2             | 2               | 1           | 1               | 1       | 0        |
| 2013             | 21            | 5              | 4              | 2             | 4             | 2               | 3           | 1               | 1       | 3        |
| 2014             | 25            | 11             | 5              | 3             | 4             | 3               | 2           | 1               | 3       | 1        |
| 2015             | 22            | 8              | 7              | 0             | 3             | 2               | 0           | 0               | 0       | 1        |
| 2016             | 32            | 9              | 2              | 1             | 6             | 2               | 2           | 4               | 1       | 2        |
| 2017             | 29            | 12             | 3              | 2             | 2             | 6               | 1           | 4               | 2       | 1        |
| 2018             | 32            | 5              | 6              | 0             | 3             | 3               | 3           | 4               | 1       | 1        |
| 2019             | 30            | 6              | 2              | 2             | 2             | 1               | 1           | 3               | 0       | 2        |
| 2020             | 34            | 7              | 4              | 5             | 1             | 2               | 1           | 1               | 1       | 1        |
| KeyWords Plus    |               |                |                |               |               |                 |             |                 |         |          |
| Year             | Riparian Zone | Riparian Zones | Rivers         | United States | Water Quality | Nitrogen        | Groundwater | Denitrification | China   | Forestry |
| 2001             | 16            | 1              | 4              | 9             | 8             | 8               | 7           | 6               | 0       | 2        |
| 2002             | 13            | 3              | 2              | 11            | 3             | 5               | 4           | 9               | 3       | 5        |
| 2003             | 21            | 0              | 2              | 12            | 7             | 5               | 5           | 7               | 1       | 4        |
| 2004             | 24            | 3              | 0              | 10            | 6             | 4               | 4           | 8               | 0       | 7        |
| 2005             | 24            | 2              | 0              | 13            | 8             | 3               | 6           | 1               | 0       | 6        |
| 2006             | 34            | 6              | 8              | 17            | 12            | 11              | 14          | 8               | 1       | 12       |
| 2007             | 36            | 0              | 6              | 9             | 13            | 4               | 7           | 5               | 0       | 6        |
| 2008             | 39            | 3              | 1              | 18            | 16            | 8               | 18          | 10              | 4       | 3        |
| 2009             | 45            | 13             | 12             | 16            | 12            | 9               | 5           | 11              | 4       | 14       |
| 2010             | 38            | 19             | 7              | 16            | 14            | 11              | 6           | 13              | 2       | 20       |
| 2011             | 32            | 10             | 11             | 13            | 12            | 8               | 8           | 5               | 0       | 6        |
| 2012             | 48            | 18             | 19             | 23            | 10            | 5               | 9           | 9               | 7       | 4        |
| 2013             | 38            | 11             | 20             | 11            | 5             | 4               | 6           | 3               | 9       | 10       |
| 2014             | 30            | 15             | 14             | 13            | 12            | 13              | 12          | 8               | 6       | 12       |
| 2015             | 40            | 12             | 14             | 8             | 7             | 13              | 8           | 2               | 5       | 6        |
| 2016             | 55            | 21             | 20             | 8             | 16            | 7               | 9           | 7               | 25      | 8        |
| 2017             | 55            | 18             | 23             | 8             | 12            | 41              | 17          | 17              | 19      | 6        |
| 2018             | 43            | 14             | 16             | 9             | 18            | 7               | 14          | 16              | 20      | 3        |
| 2019             | 46            | 17             | 28             | 7             | 9             | 15              | 11          | 13              | 22      | 6        |
| 2020             | 40            | 19             | 29             | 3             | 10            | 10              | 10          | 14              | 35      | 10       |

### Additional Supporting Information (File uploaded separately)

**Dataset S1.** Bibliographic records as queried from Scopus (primary data)
